# Supplementary material
Source: publisher figshare collection journal article supplement (https://wiley.figshare.com/articles/dataset/_/3547068)
Supplement: Supplementary file 1 [file 1]

**Orr Spiegel and Ran Nathan. 2010. Incorporating density dependence into the directed-dispersal hypothesis. *Ecology* 91:1538–1548.**

**Appendix B. Analytical model for the DrD paradox (the quadratic version).**

Consider the same model described in Appendix A (presented here for the case of  $R = 1$ ), modified to demonstrate nonlinear habitat response. Hence, equation (A.6) is replaced by

$$\omega = \beta - \alpha\delta^2. \quad (\text{B.1})$$

Consequently, survival function and fitness of the RD and the DrD strategy in the two habitats will change. The net fitness function will now be

$$\begin{aligned} \Delta F = & (\beta_1 - \alpha_1 N^2 \Omega^2) N H_1 \Omega + \frac{(N - N H_1 \Omega)}{(1 - H_1)^2} \left( \beta_2 - \frac{\alpha_2 (N - N H_1 \Omega)^2}{(1 - H_1)^2} \right) \\ & - N (H_1 \beta_1 - H_1 \alpha_1 N^2 + \beta_2 - \alpha_2 N^2 - H_1 \beta_2 + H_1 \alpha_2 N^2) \end{aligned} \quad (\text{B.2})$$

Here the net fitness gain is a third-order polynomial function of  $\Omega$  with three following solutions ( $\Omega_a, \Omega_b, \Omega_c$ ) for DrD levels that lead to no fitness gain ( $\Delta F = 0$ ):

$$\Omega_a = 1$$

$$\Omega_{b,c} = \frac{Q \pm \sqrt{-(H_1 - 1)^2 W}}{3N(\alpha_1 - 2H_1\alpha_1 + H_1^2\alpha_1 - \alpha_2 H_1^2)}$$

where

$$Q = 2N\alpha_1 H_1 - N H_1^2 \alpha_1 + N H_1^2 \alpha_2 - 3N\alpha_2 H_1 - N\alpha_1$$

$$\begin{aligned} W = & 4\alpha_2 \beta_2 H_1^2 + 4\alpha_2 \beta_1 H_1^2 + 4\alpha_1 \beta_2 H_1^2 + 3\alpha_2^2 N^2 H_1^2 - 4\alpha_1 \beta_1 H_1^2 + 3\alpha_1^2 N^2 H_1^2 - 6\alpha_1 \alpha_2 N^2 H_1^2 \\ & + 6\alpha_1 \alpha_2 N^2 H_1 + 8\alpha_1 \beta_1 H_1 - 8\alpha_1 \beta_2 H_1 - 6\alpha_1^2 N^2 H_1 + 3\alpha_1^2 N^2 + 4\alpha_1 \beta_2 - 12\alpha_1 \alpha_2 N^2 - 4\alpha_1 \beta_1 \end{aligned}$$

One of the solutions  $\Omega_{b,c}$  is in the negative range of  $\Omega$ , which is biologically irrelevant. The other

solution is within  $\Omega$  biologically defined range (but not above  $\Omega$  upper threshold) according to the numeric values of the parameters  $N, \alpha_1, \beta_1, \alpha_2, \beta_2$ , and  $H_1$ .

The net fitness gain function ( $\Delta F$ ) for this model has two vertex points

$$\Omega^* = \frac{3NH_1\alpha_2 \pm (H_1 - 1)\sqrt{(-3Q)}}{3N[H_1^2(\alpha_2 - \alpha_1) + \alpha_1(2H_1 - 1)]} \quad (\text{B.3})$$

Where Q is

$$\alpha_1\beta_1H_1^2 - \alpha_2\beta_2H_1^2 + \alpha_2\beta_1H_1^2 + \alpha_1\beta_2H_1^2 - 2\alpha_1\beta_2H_1 + 2\alpha_1\beta_1H_1 + \alpha_1\beta_1 + \alpha_1\beta_2 - 3\alpha_1\alpha_2N^2$$

Unavoidably, One of the  $\Omega^*$  solution is in the negative range of the  $\Omega$  parameter, and therefore undefined.

### Results

To demonstrate a numerical solution to this nonlinear model and the net fitness gain ( $\Delta F$ ) as a function of the DrD level,  $\Omega$ , we use an arbitrarily chosen set of values for the model parameters. Note that the values of  $\alpha$  cannot correspond to the linear model as it is now limited to the range  $0 < \alpha < 1/\delta^2$  instead of  $0 < \alpha < 1/\delta$ . The results are similar to those of the linear model, where for each parameter set, the fitness gain rises to a maximum at  $\Omega^*$ , and then drops off as  $\Omega$  increases (Fig. B1).

The combined effect of the density-dependent suitability ratio and the density-independent suitability ratio ( $\beta$  ratio) on  $\Omega^*$  shows an asymptotic pattern (Fig. B2). As in the linear model the effect of  $\beta$  ratio is significantly stronger in the lower range, but it reaches saturation in an asymptote at the value of  $\Omega^* = 6.1$  for this specific example, or of

$$\Omega^* \Big|_{\beta_1=1, \beta_2=0} = \frac{-3NH_1\alpha_2 \pm \sqrt{3[(H_1 - 1)^2(H_1^2\alpha_1 - \alpha_2H_1^2 - 2H_1\alpha_1 + 3\alpha_1\alpha_2N^2 + \alpha_1)]}}{3N(\alpha_1 - 2H_1\alpha_1 + H_1^2\alpha_1 - \alpha_2H_1^2)}$$

for the general case. When density-independent suitability ratio approaches its maximal limit the asymptote is

$$\lim_{\alpha_2 \rightarrow 1/N} (\Omega^*) = \frac{3NH_1 \pm \frac{H_1}{N} \sqrt{3(\beta_2 - \beta_1)(H_1 - 1)^2}}{3H_1^2}.$$

**Fig. B1.**

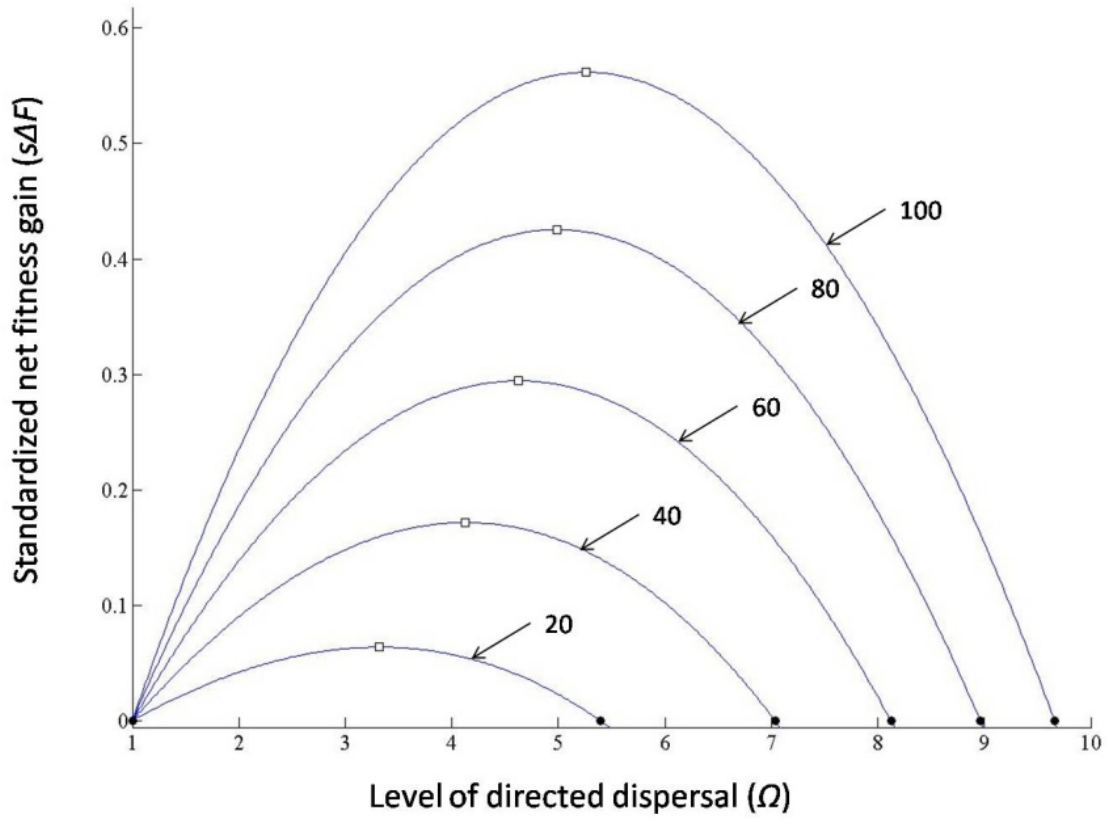

**FIG. B1.** Results of the analytical nonlinear model describing the effect of DrD level ( $\Omega$ ) on expected fitness gain of DrD strategy in comparison with random dispersal ( $s\Delta F$ ; standardized by fecundity). Each line represents a model solution using a different ratio of density-dependent suitability between the two simulated habitats (i.e.,  $\alpha_2/\alpha_1$  ratio; values noted with arrows). A higher ratio represents a stronger difference between habitats, hence a higher fitness gain for a given  $\Omega$ , along with a wider range of positive fitness gain values. Points of maximum fitness gain ( $\Omega^*$ ) and zero fitness gain ( $\Omega_a, \Omega_b$ ) are marked (empty squares and solid circles, respectively). Other parameters were set as follows:  $N = 1000$ ,  $H_1 = 0.1$ ,  $\alpha_1 = 9 \cdot 10^{-9}$ ,  $\beta_1 = 1$ ,  $\beta_2 = 1$ .

**Fig. B2.**

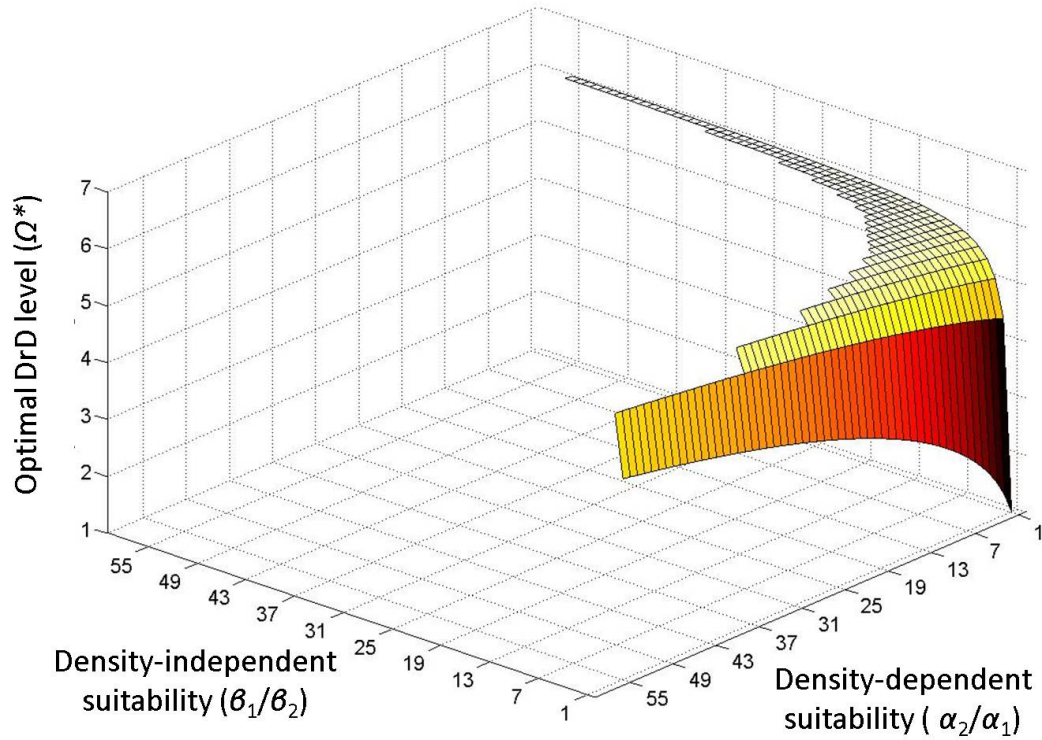

**FIG. B2.** The effect of differences in habitat suitability on DrD levels ( $Q^*$ ) maximizing the net fitness gain for nonlinear habitat response. Increasing values in both horizontal axes indicate increasing differences between habitats, either in density-independent suitability ( $\beta$  ratio:  $\beta_1/\beta_2$ ) or in their density-dependent suitability ( $\alpha$  ratio:  $\alpha_2/\alpha_1$ ). The  $Q^*$  value rises fast with the increase in the density-independent suitability ratio until it reaches an asymptote at  $Q^* = 6.1$ . The asymptote of high density-dependent suitability is not reachable within the parameters definition range. Other parameters were set as follows:  $N = 1000$ ,  $H_1 = 0.1$ ,  $\beta_1 = 1$ ,  $\alpha_1 = 9 \cdot 10^{-9}$ .
